# Supplementary material for: Association of Atrial Fibrillation Progression With Left Atrial Functional Reserve and Its Reversibility
Source: PubMed Central journal article supplement — J Am Heart Assoc. 2023 Dec 29;13(1):e032215. doi: 10.1161/JAHA.123.032215 (PMC10863802; doi:10.1161/jaha.123.032215), 2023-12-29
Supplement: JAH3-13-e032215-s001.pdf [file JAH3-13-e032215-s001.pdf]

# **SUPPLEMENTAL MATERIAL**

**Table S1. Change of preprocedural echocardiographic parameters through PLL.**

|                                                  | PAF<br>(N=95) | PeAF<br>(N=50) | LS-PeAF<br>(N=19) | P value |
|--------------------------------------------------|---------------|----------------|-------------------|---------|
| LV end-diastolic volume index, ml/m <sup>2</sup> | 2.2±7.5       | 1.4±5.5        | 1.4±4.0           | 0.530   |
| LV end-systolic volume index, ml/m <sup>2</sup>  | 1.1±3.6       | 0.4±3.0        | 0.2±1.6           | 0.529   |
| LV ejection fraction, %                          | -0.5±6.4      | -0.2±5.0       | 0.4±4.0           | 0.891   |
| E wave, cm/s                                     | 6.8±9.7       | 6.2±10.9       | 7.6±12.1          | 0.623   |
| e' wave, cm/s                                    | 1.0±1.4       | 0.9±1.2        | 1.4±1.0           | 0.274   |
| E/e' ratio                                       | -0.2±1.9      | -0.1±1.9       | -0.3±1.1          | 0.764   |
| LA volume index, ml/m <sup>2</sup>               | 0.8±4.4       | 1.0±9.2        | 2.7±5.0           | 0.174   |
| LARS, %                                          | 2.0±4.4       | 1.6±5.0        | -1.0±2.9*         | 0.003   |

E = early diastolic transmitral flow velocity, e' = early diastolic mitral annular velocity, LA = left atrium, LARS = left atrial reservoir strain, LS-PeAF = long-standing persistent atrial fibrillation, LV = left ventricle, PAF = paroxysmal atrial fibrillation, PeAF = persistent atrial fibrillation and PLL = passive leg lifting. \*p<0.05 vs PAF group.

**Table S2. Baseline characteristics stratified by LA functional reserve.**

|                                              | Preserved LA functional reserve (N=104) | Impaired LA functional reserve (N=60) | P value |
|----------------------------------------------|-----------------------------------------|---------------------------------------|---------|
| AF types                                     |                                         |                                       | 0.026   |
| PAF, n (%)                                   | 66 (63.5)                               | 29 (48.3)                             |         |
| PeAF, n (%)                                  | 31 (29.8)                               | 19 (31.7)                             |         |
| LS-PeAF, n (%)                               | 7 (6.7)                                 | 12 (20.0)                             |         |
| Age, years                                   | 63±12                                   | 67±9                                  | 0.030   |
| Men, n (%)                                   | 70 (67.3)                               | 46 (76.7)                             | 0.205   |
| Body mass index, kg/m <sup>2</sup>           | 24.6±3.6                                | 24.6±2.7                              | 0.645   |
| Systolic blood pressure, mmHg                | 123±17                                  | 119±15                                | 0.247   |
| Diastolic blood pressure, mmHg               | 69±12                                   | 67±11                                 | 0.784   |
| Heart rate, beats/min                        | 73±11                                   | 76±14                                 | 0.156   |
| Current smoking, n (%)                       | 10 (9.6)                                | 6 (10.0)                              | 0.936   |
| Hypertension, n (%)                          | 51 (49.0)                               | 33 (55.0)                             | 0.462   |
| Diabetes mellitus, n (%)                     | 20 (19.2)                               | 15 (25.0)                             | 0.385   |
| Dyslipidemia, n (%)                          | 44 (42.3)                               | 26 (43.3)                             | 0.898   |
| CHA <sub>2</sub> DS <sub>2</sub> -VASc score | 2 (1-3)                                 | 2 (1-3)                               | 0.181   |
| Medications                                  |                                         |                                       |         |
| β blocker, n (%)                             | 38 (36.5)                               | 23 (38.3)                             | 0.819   |
| RAAS blockers, n (%)                         | 26 (25.0)                               | 25 (41.7)                             | 0.026   |
| Calcium channel blocker, n (%)               | 35 (33.7)                               | 22 (36.7)                             | 0.696   |
| Statin, n (%)                                | 30 (28.8)                               | 17 (28.3)                             | 0.944   |
| Oral anti-diabetic drug, n (%)               | 17 (16.3)                               | 11 (18.3)                             | 0.745   |
| Antiarrhythmic drug, n (%)                   | 31 (29.8)                               | 19 (31.7)                             | 0.803   |
| Laboratory data                              |                                         |                                       |         |
| LDL cholesterol, mg/dl                       | 115±33                                  | 116±28                                | 0.872   |
| HDL cholesterol, mg/dl                       | 61±16                                   | 59±17                                 | 0.646   |
| Triglyceride, mg/dl                          | 97 (66-141)                             | 109 (76-152)                          | 0.208   |
| Fasting blood glucose, mg/dl                 | 104±36                                  | 109±35                                | 0.170   |
| eGFR, ml/min/1.73m <sup>2</sup>              | 68±15                                   | 65±15                                 | 0.197   |
| C-reactive protein, mg/dl                    | 0.06 (0.03-0.12)                        | 0.08 (0.04-0.17)                      | 0.109   |
| BNP, pg/ml                                   | 46 (21-97)                              | 56 (35-131)                           | 0.218   |

AF = atrial fibrillation, BNP = B-type natriuretic peptide, eGFR = estimated glomerular filtration rate, HDL = high density lipoprotein, LA = left atrium, LDL = low density lipoprotein, LS-PeAF = long-standing persistent atrial fibrillation, PAF = paroxysmal atrial fibrillation, PeAF = persistent atrial fibrillation and RAAS = renin-angiotensin-aldosterone system.

**Table S3. Echocardiographic parameters at rest and PLL according to LA functional reserve.**

|                                                  | Preserved LA functional reserve (N=104) |           |         | Impaired LA functional reserve (N=60) |           |         | P value (Rest) | P value (PLL) |
|--------------------------------------------------|-----------------------------------------|-----------|---------|---------------------------------------|-----------|---------|----------------|---------------|
|                                                  | Rest                                    | PLL       | P value | Rest                                  | PLL       | P value |                |               |
| LV end-diastolic volume index, ml/m <sup>2</sup> | 41.2±11.1                               | 43.4±11.2 | 0.001   | 39.1±11.2                             | 40.4±11.3 | 0.118   | 0.228          | 0.088         |
| LV end-systolic volume index, ml/m <sup>2</sup>  | 14.9±5.2                                | 15.7±4.8  | 0.017   | 14.7±5.3                              | 15.4±5.6  | 0.079   | 0.950          | 0.516         |
| LV ejection fraction, %                          | 63.9±6.1                                | 63.8±6.0  | 0.885   | 63.0±6.7                              | 62.3±6.4  | 0.305   | 0.400          | 0.135         |
| LV mass index, g/m <sup>2</sup>                  | 85.2±18.7                               | -         | -       | 86.3±21.9                             | -         | -       | 0.879          | -             |
| E wave, cm/s                                     | 73.3±19.6                               | 80.8±18.0 | <0.001  | 72.4±16.5                             | 77.7±19.1 | <0.001  | 0.962          | 0.295         |
| e' wave, cm/s                                    | 8.7±2.3                                 | 9.8±2.5   | <0.001  | 8.9±2.6                               | 9.9±2.9   | <0.001  | 0.706          | 0.916         |
| E/e' ratio                                       | 8.8±2.8                                 | 8.7±2.5   | 0.511   | 8.6±2.5                               | 8.3±2.3   | 0.155   | 0.933          | 0.230         |
| LA volume index, ml/m <sup>2</sup>               | 35.5±13.8                               | 36.8±13.6 | 0.0495  | 36.9±11.9                             | 37.4±14.7 | 0.389   | 0.326          | 0.874         |
| LARS, %                                          | 24.1±9.8                                | 28.0±10.0 | <0.001  | 24.1±9.9                              | 21.4±9.4  | <0.001  | 1.000          | <0.001        |

E = early diastolic transmitral flow velocity, e' = early diastolic mitral annular velocity, LA = left atrium, LARS = left atrial reservoir strain, LV = left ventricle and PLL = passive leg lifting.

**Table S4. Change of postprocedural echocardiographic parameters through PLL.**

|                                                  | PAF<br>(N=90) | PeAF<br>(N=43) | LS-PeAF<br>(N=16) | P value |
|--------------------------------------------------|---------------|----------------|-------------------|---------|
| LV end-diastolic volume index, ml/m <sup>2</sup> | 1.8±7.8       | 0.9±6.5        | 2.6±8.7           | 0.663   |
| LV end-systolic volume index, ml/m <sup>2</sup>  | 0.7±3.5       | 0.2±3.4        | 0.7±3.6           | 0.577   |
| LV ejection fraction, %                          | -0.3±4.7      | 0.4±4.8        | 0.7±5.8           | 0.721   |
| E wave, cm/s                                     | 5.6±10.0      | 5.6±12.1       | 5.1±5.6           | 0.992   |
| e' wave, cm/s                                    | 0.6±1.1       | 0.8±1.6        | 0.6±1.2           | 0.524   |
| E/e' ratio                                       | 0.04±1.7      | -0.4±2.5       | 0.1±1.4           | 0.364   |
| LA volume index, ml/m <sup>2</sup>               | 1.6±4.8       | 1.6±5.2        | 2.4±5.1           | 0.656   |
| LARS, %                                          | 0.9±3.7       | 1.6±4.1        | 1.0±3.3           | 0.618   |

E = early diastolic transmitral flow velocity, e' = early diastolic mitral annular velocity, LA = left atrium, LARS = left atrial reservoir strain, LS-PeAF = long-standing persistent atrial fibrillation, LV = left ventricle, PAF = paroxysmal atrial fibrillation, PeAF = persistent atrial fibrillation and PLL = passive leg lifting.
